# Supplementary material for: Role of specific solute–solvent interactions on the photophysical properties of distyryl substituted BODIPY derivatives
Source: Royal Society of Chemistry journal article supplement (doi:10.1039/d0cp00034e), 2020-01-01
Supplement: d0cp00034e1.pdf [file d0cp00034e1.pdf]

## **The role of specific solute-solvent interactions on the photophysical properties of Distyryl Substituted BODIPY derivatives.**

Mariagrazia Fortino,<sup>\*a</sup> Elisabetta Collini,<sup>b</sup> Alfonso Pedone<sup>c</sup> and Julien Bloino<sup>a</sup>

---

<sup>a</sup> *Scuola Normale Superiore, Pisa, 56126, Italy.*

<sup>b</sup> *Università degli studi di Padova, Padova, 35122, Italy.*

<sup>c</sup> *Università di Modena e Reggio Emilia, 45125, Modena, Italy.*

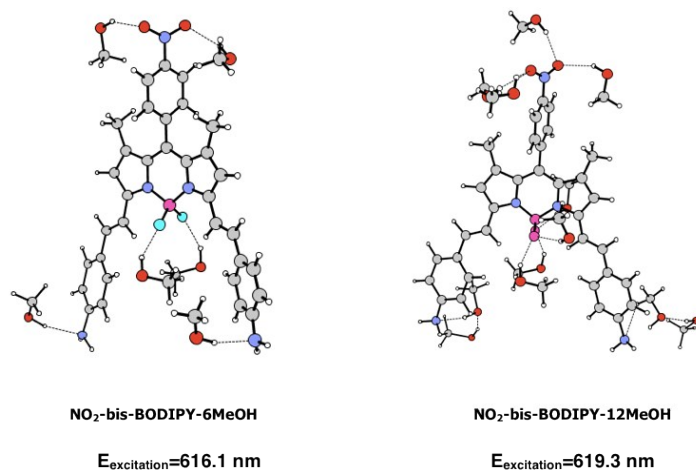

**Fig.S1** NO<sub>2</sub>-bis-BODIPY-6MeOH and the larger solvated model NO<sub>2</sub>-bis-BODIPY-12MeOH optimized at MN15/6-311G(d,p) level of theory along with the computed TD-DFT vertical excitation energy.

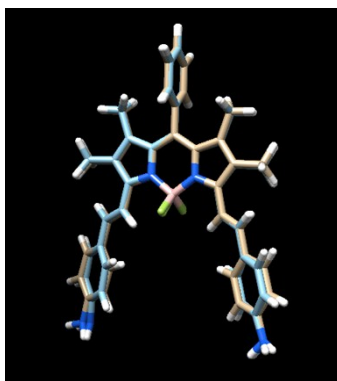

**Fig. S2** Match of optimized structures for bis-BODIPY and bis-BODIPY-4MeOH. Methanol molecules have been obscured to simplify the comparison.

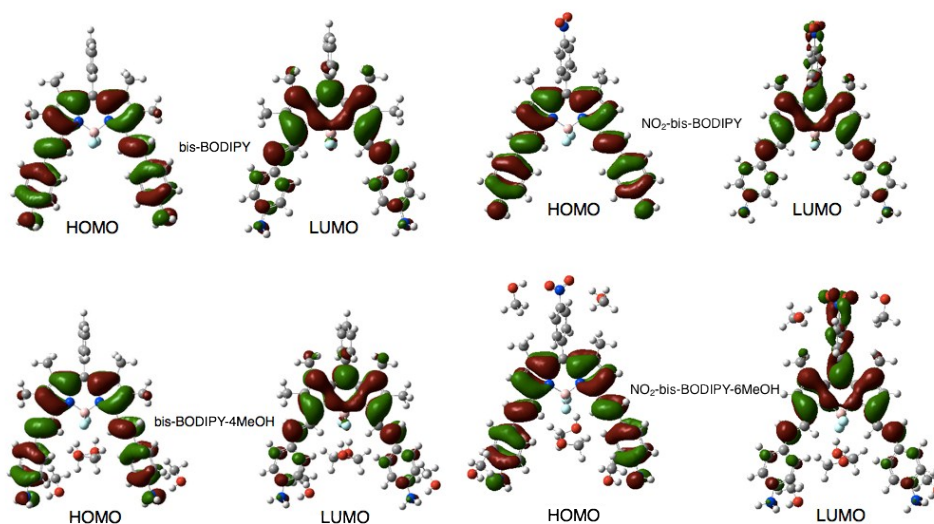

**Fig.S3** Computed HOMOs and LUMOs for bis-BODIPY-PCM and bis-BODIPY-4MeOH (upper panel) and NO<sub>2</sub>-bis-BODIPY-PCM and NO<sub>2</sub>-bis-BODIPY-6MeOH (lower panel).

**Table S1.** Computed  $\Delta E_{\text{HOMO-LUMO}}$  values for bis-BODIPY-PCM, bis-BODIPY-4MeOH, NO<sub>2</sub>-bis-BODIPY-PCM and NO<sub>2</sub>-bis-BODIPY-6MeOH and expressed in eV.

|                                        | $\Delta E_{\text{HOMO-LUMO}}$ (eV) |
|----------------------------------------|------------------------------------|
| <b>bis-BODIPY-PCM</b>                  | 3.17                               |
| <b>bis-BODIPY-4MeOH</b>                | 3.24                               |
| <b>NO<sub>2</sub>-bis-BODIPY-PCM</b>   | 3.09                               |
| <b>NO<sub>2</sub>-bis-BODIPY-6MeOH</b> | 3.14                               |

**Table S2.** Computed transition energies and transition dipole moments (TDMs) for bis-BODIPY-PCM, bis-BODIPY-4MeOH, NO<sub>2</sub>-bis-BODIPY-PCM and NO<sub>2</sub>-bis-BODIPY-6MeOH used for the simulation of the 2D electronic spectra.

|                                        | Transition Energies (cm <sup>-1</sup> ) | TDMs (xyz components)    |
|----------------------------------------|-----------------------------------------|--------------------------|
| <b>bis-BODIPY-PCM</b>                  | 16312.6                                 | -2.0191; 3.9985; -0.0695 |
| <b>bis-BODIPY-4MeOH</b>                | 16552.7                                 | -1.9939; 3.788; 0.0251   |
| <b>NO<sub>2</sub>-bis-BODIPY-PCM</b>   | 16030.0                                 | -0.0109; -4.7687; 0.0091 |
| <b>NO<sub>2</sub>-bis-BODIPY-6MeOH</b> | 16231.9                                 | 2.0381; -3.8059; 0.0801  |

**Equations:** Recursion relations.

S1

$$\langle \bar{v} | \bar{v} \rangle = \frac{1}{\sqrt{2\bar{v}_i}} \left[ D_i \langle \bar{v} | \bar{v} - 1_i \rangle + \sum_{j=1}^N \sqrt{2(\bar{v}_j - \delta_{ij})} C_{ij} \langle \bar{v} | \bar{v} - 1_i - 1_j \rangle + \sum_{j=1}^N \sqrt{\bar{v}_j} E_{ij} \langle \bar{v} - 1_j | \bar{v} - 1_i \rangle \right]$$

S2

$$\langle \bar{v} | \bar{v} \rangle = \frac{1}{\sqrt{2\bar{v}_i}} \left[ B_i \langle \bar{v} - 1_i | \bar{v} \rangle + \sum_{j=1}^N \sqrt{2(\bar{v}_j - \delta_{ij})} A_{ij} \langle \bar{v} - 1_i - 1_j | \bar{v} \rangle + \sum_{j=1}^N \sqrt{\bar{v}_j} E_{ij} \langle \bar{v} - 1_i | \bar{v} - 1_j \rangle \right]$$

**Example of input file for vibronic computation with internal coordinates, performed by using a locally modified version of GAUSSIAN16**

```
%oldchk=checkpointlowerstate.chk
#P MN15/ChkBasis Int=UltraFine SCF=Tight Geom=(check) Freq=(ReadFC,ReadNM,ReadFCHT) NoSymm
```

Vibronic simulations

0 1

```
AH FCHT EMI (or OPA)
PrtMat=12
TD=GauHWHM=250
Internal=(Redundant=PIC,NonRedundant=DIC)
```

checkpointupperstate.chk

**Example of input file for 2DES simulation performed by using Spectron 2.7**

```
REGISTRATION
KI
$END
```

```
$SYSTEM
NUMMODES 1
ES_NUMST 2
```

```
ES_EVALS 'name of file containing excitation_energies'  
ES_EDIPS 'name of file containing transition moments'  
ES_LAMBDA 'name of file containing lambda values'  
ELECTRONIC 1  
$SEND
```

```
$BATH  
BATH_MODEL MM_Brownian_spectral_density  
OSCILLATORS_NUM 1  
TEMPERATURE 300  
TIMESCALES 'value of timescale in fs'  
SPECTRAL_DENSITIES 'name of file containing spectral densities'  
SMOOTHING Gaussian  
$SEND
```

```
$SKI  
NUM_SHOTS 5000  
DEL_TIME2 'value of waiting time'  
INI_FREQ1 'initial value of excitation energy'  
FIN_FREQ1 'final value of excitation energy'  
NUM_FREQ1 600  
INI_FREQ3 'initial value of excitation energy'  
FIN_FREQ3 'final value of excitation energy'  
NUM_FREQ3 600  
CAL_METHOD SOS_CGF_F  
OUT_FILE 'name for your output'  
$SEND
```
